# Supplementary material for: A molecular biomarker for prediction of clinical outcome in children with ASD, constipation, and intestinal inflammation
Source: PubMed Central journal article supplement (PMC6461625; doi:10.1038/s41598-019-42568-1), 2019-04-12

# **A molecular biomarker for prediction of clinical outcome in children with ASD, constipation, and intestinal inflammation**

Stephen J Walker, Carl D Langefeld, Kip Zimmerman, Marshall Z Schwartz, Arthur Krigsman

## **Additional Files**

**Additional File 1:** Differentially-expressed transcripts in colonic mucosa between slow responders and fast responders.

**Additional File 2:** Xxbac-B476C20.9 expression in colon and ileum.

**Additional File 1 - Differentially expressed transcripts in colonic mucosa between slow responders and fast responders**

| <u>EnsembleID</u> | <u>GeneSymbol</u> | <u>log2FoldChange</u> | <u>FoldChange</u> | <u>P-Value</u> | <u>P-Adj</u> | <u>log(P)</u> |
|-------------------|-------------------|-----------------------|-------------------|----------------|--------------|---------------|
| ENSG00000267369   | RP11-1094M14.8    | -0.702104851          | 0.614674759       | 3.12E-06       | 0.025453221  | 5.505845406   |
| ENSG00000232810   | TNF               | -0.647294951          | 0.638476333       | 9.28E-05       | NA           | 4.032452024   |
| ENSG00000231102   | RP11-298J23.5     | -0.62513039           | 0.648361176       | 2.41E-05       | 0.050330304  | 4.617982957   |
| ENSG00000235117   | RP11-229P13.20    | -0.612703438          | 0.653970091       | 0.000125974    | NA           | 3.89971908    |
| ENSG00000213434   | VTI1BP2           | -0.598490215          | 0.660444751       | 0.000330072    | NA           | 3.481391315   |
| ENSG00000223345   | HIST2H2BA         | -0.591060378          | 0.663854796       | 0.000402569    | NA           | 3.395159671   |
| ENSG00000201794   | RN7SKP130         | -0.590981588          | 0.663891052       | 0.00026536     | NA           | 3.576164541   |
| ENSG00000231466   | CTA-246H3.11      | -0.588820063          | 0.664886475       | 9.74E-06       | 0.025453221  | 5.011441043   |
| ENSG00000142233   | NTN5              | -0.586373141          | 0.666015131       | 0.000422829    | NA           | 3.373835234   |
| ENSG00000140285   | FGF7              | -0.578158876          | 0.669818034       | 0.000160506    | 0.095899974  | 3.794508728   |
| ENSG00000254656   | RTL1              | -0.574952069          | 0.671308554       | 0.00039568     | NA           | 3.402655901   |
| ENSG00000225146   | AC073957.15       | -0.568068712          | 0.674519141       | 0.00057422     | NA           | 3.240921685   |
| ENSG00000214975   | PPIAP29           | -0.560014856          | 0.678295179       | 0.00075151     | NA           | 3.124065236   |
| ENSG00000226380   | MIR29B1           | -0.556495598          | 0.679951807       | 6.47E-06       | 0.025453221  | 5.189095719   |
| ENSG00000258581   | RP11-638I2.10     | -0.545510569          | 0.685148886       | 0.000874406    | NA           | 3.058286871   |
| ENSG00000143185   | XCL2              | -0.540104603          | 0.687721044       | 0.000736287    | NA           | 3.132952867   |
| ENSG00000227083   | L29074.3          | -0.539825487          | 0.687854109       | 0.000438526    | NA           | 3.358004652   |
| ENSG00000019991   | HGF               | -0.539420339          | 0.688047304       | 0.000846236    | 0.126745464  | 3.072508503   |
| ENSG00000145777   | TSLP              | -0.535547814          | 0.689896662       | 0.000854586    | 0.126745464  | 3.068244226   |
| ENSG00000240007   | RP6-206I17.4      | -0.535424327          | 0.689955716       | 0.000912814    | NA           | 3.039617708   |
| ENSG00000267671   | RP11-115K3.2      | -0.535326762          | 0.690002377       | 0.000570659    | NA           | 3.243623329   |
| ENSG00000157168   | NRG1              | -0.529736975          | 0.692681009       | 0.00033224     | 0.104657875  | 3.478548082   |
| ENSG00000255987   | RP11-1094M14.4    | -0.529004424          | 0.693032818       | 0.00096555     | 0.133558216  | 3.015225232   |
| ENSG00000198155   | ZNF876P           | -0.522829264          | 0.69600556        | 0.000358124    | 0.106870746  | 3.445966573   |
| ENSG00000226440   | RP11-506B6.6      | -0.522164625          | 0.696326278       | 0.000570276    | NA           | 3.243914905   |
| ENSG00000155918   | RAET1L            | -0.508310052          | 0.703045491       | 0.000237783    | NA           | 3.623819198   |
| ENSG00000146592   | CREB5             | -0.503288058          | 0.705497043       | 0.000624865    | 0.118792513  | 3.2042138     |
| ENSG00000171094   | ALK               | -0.502856371          | 0.705708176       | 0.000891911    | 0.13043101   | 3.04967848    |

|                 |                |              |             |             |             |             |
|-----------------|----------------|--------------|-------------|-------------|-------------|-------------|
| ENSG00000232677 | LINC00665      | -0.497910861 | 0.708131471 | 0.000563055 | 0.114740192 | 3.249449181 |
| ENSG00000183386 | FHL3           | -0.492712051 | 0.710687854 | 0.000121161 | 0.087369445 | 3.916637151 |
| ENSG00000232110 | RP11-149I23.3  | -0.485062417 | 0.714466158 | 0.000479722 | NA          | 3.319010364 |
| ENSG00000160716 | CHRN2          | -0.477128587 | 0.718406054 | 6.37E-06    | 0.025453221 | 5.195860568 |
| ENSG00000227413 | RP5-1042K10.12 | -0.471103234 | 0.72141272  | 0.000826472 | 0.126154599 | 3.082771855 |
| ENSG00000253919 | PRKRIRP7       | -0.467064509 | 0.723435094 | 2.80E-05    | 0.051009747 | 4.552841969 |
| ENSG00000227006 | RP5-956O18.2   | -0.459486617 | 0.727245003 | 0.000580686 | 0.114921083 | 3.236058644 |
| ENSG00000213197 | AC012066.1     | -0.449869244 | 0.732109198 | 0.00014719  | 0.090829249 | 3.832121695 |
| ENSG00000104728 | ARHGFE10       | -0.448555441 | 0.732776204 | 3.13E-05    | 0.051009747 | 4.504455662 |
| ENSG00000261528 | AC002400.1     | -0.446082691 | 0.734033244 | 0.000866134 | 0.127553495 | 3.062414913 |
| ENSG00000228196 | PTPN2P1        | -0.444452097 | 0.734863348 | 0.000135875 | 0.090829249 | 3.866860443 |
| ENSG00000171790 | SLFNL1         | -0.433311381 | 0.740560045 | 0.000245432 | 0.10305307  | 3.610068814 |
| ENSG00000254317 | RP11-473O4.5   | -0.431675896 | 0.741400043 | 0.000403583 | 0.111048967 | 3.394067136 |
| ENSG00000248476 | BACH1-IT1      | -0.41995986  | 0.74744542  | 0.000310623 | 0.104657875 | 3.50776639  |
| ENSG00000120694 | HSPH1          | -0.416770232 | 0.749099762 | 0.000925744 | 0.132596927 | 3.033509094 |
| ENSG00000240731 | RP5-890O3.9    | -0.405098251 | 0.755184861 | 0.000388036 | 0.109656921 | 3.411127981 |
| ENSG00000236194 | AC003104.1     | -0.391111739 | 0.762541764 | 0.000401415 | 0.111048967 | 3.396406403 |
| ENSG00000224997 | AL049840.1     | -0.38264089  | 0.767032233 | 0.000528364 | 0.114740192 | 3.277066781 |
| ENSG00000175564 | UCP3           | -0.364603376 | 0.77668237  | 0.000914847 | 0.131939809 | 3.038651532 |
| ENSG00000255220 | DDX18P5        | -0.360082448 | 0.779120053 | 0.000791325 | 0.125163736 | 3.101645114 |
| ENSG00000134470 | IL15RA         | -0.350951327 | 0.784066906 | 0.000434815 | 0.11108458  | 3.361695482 |
| ENSG00000219665 | CTD-2006C1.2   | -0.346777234 | 0.786338701 | 0.000286958 | 0.104657875 | 3.542181663 |
| ENSG00000246422 | CTD-2024I7.13  | -0.345226998 | 0.787184109 | 0.000340318 | 0.104657875 | 3.46811508  |
| ENSG00000180089 | TMEM86B        | -0.340670202 | 0.789674384 | 0.000338316 | 0.104657875 | 3.470677463 |
| ENSG00000261355 | RP11-698N11.4  | -0.337641149 | 0.79133411  | 0.000167277 | 0.097169092 | 3.776563769 |
| ENSG00000166246 | C16orf71       | -0.337488024 | 0.791418106 | 0.000372967 | 0.108326299 | 3.428329593 |
| ENSG00000256690 | RP11-727F15.9  | -0.334391175 | 0.793118766 | 4.62E-05    | 0.060372026 | 4.335358024 |
| ENSG00000134013 | LOXL2          | -0.33145016  | 0.794737233 | 0.00069806  | 0.122803898 | 3.156107247 |
| ENSG00000269808 |                | -0.328740068 | 0.796231544 | 0.000595078 | 0.115224761 | 3.225426105 |
| ENSG00000260772 | RP11-311C24.1  | -0.275620227 | 0.826095096 | 5.35E-05    | 0.065819972 | 4.271646218 |
| ENSG00000165632 | TAF3           | -0.272136548 | 0.82809228  | 7.27E-05    | 0.071239686 | 4.138465589 |

|                 |              |              |             |             |             |             |
|-----------------|--------------|--------------|-------------|-------------|-------------|-------------|
| ENSG00000171574 | ZNF584       | -0.271932742 | 0.828209271 | 0.000759806 | 0.125163736 | 3.119297281 |
| ENSG00000065526 | SPEN         | -0.271364056 | 0.828535802 | 0.000241328 | 0.10305307  | 3.617392286 |
| ENSG00000175471 | MCTP1        | -0.256123086 | 0.837335046 | 0.000424634 | 0.11108458  | 3.371985235 |
| ENSG00000184675 | AMER1        | -0.24676565  | 0.842783719 | 0.000309307 | 0.104657875 | 3.509610251 |
| ENSG00000142207 | URB1         | -0.243626232 | 0.84461968  | 0.000762578 | 0.125163736 | 3.117715728 |
| ENSG00000127947 | PTPN12       | -0.241143288 | 0.846074561 | 0.000319279 | 0.104657875 | 3.495829645 |
| ENSG00000102908 | NFAT5        | -0.23014906  | 0.852546802 | 1.10E-05    | 0.025488908 | 4.958607315 |
| ENSG00000126215 | XRCC3        | -0.222979967 | 0.856793852 | 0.00024473  | 0.10305307  | 3.61131279  |
| ENSG00000157827 | FMNL2        | -0.211829361 | 0.863441679 | 7.49E-05    | 0.071239686 | 4.125518182 |
| ENSG00000197024 | ZNF398       | -0.209077998 | 0.865089919 | 6.36E-05    | 0.070047491 | 4.196542884 |
| ENSG00000269958 | RP11-73M18.8 | -0.200309201 | 0.870364005 | 0.000483323 | 0.114740192 | 3.315762538 |
| ENSG00000138668 | HNRNPD       | -0.198752991 | 0.871303358 | 6.79E-05    | 0.071005586 | 4.168130226 |
| ENSG00000075407 | ZNF37A       | -0.175520223 | 0.885448177 | 0.000205515 | 0.099731231 | 3.687156475 |
| ENSG00000170144 | HNRNPA3      | -0.162801867 | 0.893288524 | 0.0009867   | 0.133558216 | 3.005814872 |
| ENSG00000011523 | CEP68        | -0.147845732 | 0.902597237 | 0.000450731 | 0.112210653 | 3.346082571 |
| ENSG00000177646 | ACAD9        | -0.147807471 | 0.902621175 | 0.000494727 | 0.114740192 | 3.305634387 |
| ENSG00000115216 | NRBP1        | 0.176045605  | 1.129782928 | 0.000683668 | 0.122803898 | 3.165154747 |
| ENSG00000177156 | TALDO1       | 0.188201087  | 1.139342171 | 0.000980424 | 0.133558216 | 3.008586066 |
| ENSG00000100938 | GMPR2        | 0.19207172   | 1.142403037 | 0.000582519 | 0.114921083 | 3.234689905 |
| ENSG00000158604 | TMED4        | 0.193600843  | 1.14361452  | 0.000321779 | 0.104657875 | 3.492442302 |
| ENSG00000162384 | C1orf123     | 0.201264599  | 1.149705692 | 0.000362845 | 0.106870746 | 3.440278857 |
| ENSG00000112167 | SAYSD1       | 0.203930632  | 1.151832258 | 0.000671712 | 0.122803898 | 3.172816893 |
| ENSG00000181192 | DHTKD1       | 0.218294696  | 1.163357654 | 8.81E-05    | 0.073187151 | 4.055024092 |
| ENSG00000205744 | DENND1C      | 0.219155743  | 1.16405219  | 0.000147676 | 0.090829249 | 3.83069008  |
| ENSG00000229358 | DPY19L1P1    | 0.221529734  | 1.165969244 | 0.000975688 | 0.133558216 | 3.010689036 |
| ENSG00000117448 | AKR1A1       | 0.224032284  | 1.167993531 | 3.41E-05    | 0.051009747 | 4.467245621 |
| ENSG00000085760 | MTIF2        | 0.233329348  | 1.175544659 | 0.000796664 | 0.125163736 | 3.098724807 |
| ENSG00000117242 | PINK1-AS     | 0.234356925  | 1.176382253 | 0.0005129   | 0.114740192 | 3.289967301 |
| ENSG00000249884 | RNF103-CHMP3 | 0.235255777  | 1.177115411 | 0.000813995 | 0.125163736 | 3.089378263 |
| ENSG00000166946 | CCNDBP1      | 0.237007523  | 1.178545553 | 0.000668899 | 0.122803898 | 3.174639453 |
| ENSG00000185825 | BCAP31       | 0.241750098  | 1.182426164 | 0.000208761 | 0.099731231 | 3.680350631 |

|                 |              |             |             |             |             |             |
|-----------------|--------------|-------------|-------------|-------------|-------------|-------------|
| ENSG00000234608 | MAPKAPK5-AS1 | 0.243709888 | 1.18403349  | 0.000135594 | 0.090829249 | 3.867759527 |
| ENSG00000117614 | SYF2         | 0.247331988 | 1.187009917 | 0.000339288 | 0.104657875 | 3.4694315   |
| ENSG00000117450 | PRDX1        | 0.252296713 | 1.191101793 | 0.00081146  | 0.125163736 | 3.090732883 |
| ENSG00000162441 | LZIC         | 0.252533714 | 1.191297479 | 0.000356449 | 0.106870746 | 3.448002599 |
| ENSG00000205808 | PPAPDC2      | 0.270716987 | 1.206407236 | 0.000996322 | 0.133558216 | 3.00160028  |
| ENSG00000248594 | AC003029.1   | 0.276199655 | 1.211000663 | 0.00093496  | 0.133005971 | 3.029206969 |
| ENSG00000140374 | ETFA         | 0.278562293 | 1.21298549  | 0.000547841 | 0.114740192 | 3.261345469 |
| ENSG00000100577 | GSTZ1        | 0.282144004 | 1.216000653 | 0.000527689 | 0.114740192 | 3.277621959 |
| ENSG00000145545 | SRD5A1       | 0.286755102 | 1.219893415 | 0.000508495 | 0.114740192 | 3.293713313 |
| ENSG00000132313 | MRPL35       | 0.2905787   | 1.223130807 | 0.000142351 | 0.090829249 | 3.846639478 |
| ENSG00000153774 | CFDP1        | 0.294487465 | 1.226449189 | 0.000751622 | 0.125163736 | 3.124000517 |
| ENSG00000181826 | RELL1        | 0.295166491 | 1.227026571 | 0.000746256 | 0.125163736 | 3.127112164 |
| ENSG00000069849 | ATP1B3       | 0.296183508 | 1.227891859 | 0.000337707 | 0.104657875 | 3.471459937 |
| ENSG00000167130 | DOLPP1       | 0.299762729 | 1.230941951 | 0.000553346 | 0.114740192 | 3.257003225 |
| ENSG00000131165 | CHMP1A       | 0.300140594 | 1.231264397 | 0.000107286 | 0.080127668 | 3.969456946 |
| ENSG00000101417 | PXMP4        | 0.300301994 | 1.231402151 | 0.000663589 | 0.122803898 | 3.178100822 |
| ENSG00000178537 | SLC25A20     | 0.300843876 | 1.231864758 | 0.000622028 | 0.118792513 | 3.206190066 |
| ENSG00000060642 | PIGV         | 0.303558174 | 1.234184579 | 0.000208271 | 0.099731231 | 3.681371198 |
| ENSG00000138794 | CASP6        | 0.306237122 | 1.236478472 | 0.000992896 | 0.133558216 | 3.003096239 |
| ENSG00000271092 | RP11-57H12.6 | 0.309786022 | 1.239523842 | 0.000380747 | 0.109070986 | 3.41936351  |
| ENSG00000177042 | TMEM80       | 0.312584112 | 1.241930217 | 0.000285281 | 0.104657875 | 3.544727152 |
| ENSG00000124523 | SIRT5        | 0.314490761 | 1.243572623 | 0.00020984  | 0.099731231 | 3.678111722 |
| ENSG00000164010 | ERMAP        | 0.314741152 | 1.243788473 | 0.000251325 | 0.10305307  | 3.599764309 |
| ENSG00000102078 | SLC25A14     | 0.31930346  | 1.247727994 | 9.10E-05    | 0.073187151 | 4.040958608 |
| ENSG00000123159 | GIPC1        | 0.319451561 | 1.247856088 | 0.00043489  | 0.11108458  | 3.361620579 |
| ENSG00000104886 | PLEKHJ1      | 0.320185972 | 1.248491477 | 0.000710421 | 0.122803898 | 3.148484209 |
| ENSG00000228192 | RP11-342M1.3 | 0.328947285 | 1.256096483 | 0.000754231 | 0.125163736 | 3.122495621 |
| ENSG00000213977 | TAX1BP3      | 0.333803391 | 1.260331623 | 0.000703588 | 0.122803898 | 3.152681576 |
| ENSG00000242797 | GLYCTK-AS1   | 0.336926556 | 1.263062961 | 0.00078633  | 0.125163736 | 3.104395155 |
| ENSG00000130517 | PGPEP1       | 0.337838549 | 1.263861653 | 8.34E-05    | 0.073187151 | 4.078833949 |
| ENSG00000160325 | CACFD1       | 0.347761345 | 1.272584403 | 0.000179994 | 0.099053811 | 3.744741972 |

|                 |                 |             |             |             |             |             |
|-----------------|-----------------|-------------|-------------|-------------|-------------|-------------|
| ENSG00000128311 | TST             | 0.351870057 | 1.276213816 | 0.000498475 | 0.114740192 | 3.302356618 |
| ENSG00000187210 | GCNT1           | 0.352321714 | 1.276613416 | 0.000977475 | 0.133558216 | 3.009894341 |
| ENSG00000232935 | RP11-223P11.2   | 0.354631416 | 1.278658864 | 0.000209462 | 0.099731231 | 3.678894754 |
| ENSG00000168237 | GLYCTK          | 0.356959967 | 1.280724322 | 0.000556431 | 0.114740192 | 3.254588683 |
| ENSG00000161267 | BDH1            | 0.357883709 | 1.281544619 | 0.000654331 | 0.122803898 | 3.184202504 |
| ENSG00000225335 | XXbac-B476C20.9 | 0.363957178 | 1.286951048 | 0.000230174 | 0.10305307  | 3.637943735 |
| ENSG00000117472 | TSPAN1          | 0.365838588 | 1.288630448 | 0.000679921 | 0.122803898 | 3.167541545 |
| ENSG00000169814 | BTD             | 0.366200834 | 1.28895405  | 4.07E-05    | 0.056808933 | 4.390405591 |
| ENSG00000243989 | ACY1            | 0.376982466 | 1.29862282  | 0.000267577 | 0.104657875 | 3.57255122  |
| ENSG00000114786 | ABHD14A-ACY1    | 0.390933579 | 1.311241644 | 0.00022629  | 0.10305307  | 3.645334638 |
| ENSG00000009765 | IYD             | 0.392616426 | 1.312772048 | 0.000813387 | 0.125163736 | 3.089702773 |
| ENSG00000166391 | MOGAT2          | 0.403390137 | 1.322612221 | 0.000977525 | 0.133558216 | 3.009872127 |
| ENSG00000254837 | AP001372.2      | 0.406018819 | 1.325024301 | 0.000318049 | 0.104657875 | 3.497505966 |
| ENSG00000162433 | AK4             | 0.407021408 | 1.325945436 | 0.00074978  | 0.125163736 | 3.125066148 |
| ENSG00000167117 | LINC00483       | 0.417153643 | 1.3352905   | 0.000710562 | 0.122803898 | 3.148398022 |
| ENSG00000178226 | PRSS36          | 0.420393436 | 1.338292469 | 0.000473031 | 0.114740192 | 3.325110397 |
| ENSG00000132359 | RAP1GAP2        | 0.420984033 | 1.338840439 | 0.000952136 | 0.133558216 | 3.021301014 |
| ENSG00000187699 | C2orf88         | 0.423616887 | 1.341285994 | 0.000271225 | 0.104657875 | 3.566670282 |
| ENSG00000229155 | RP11-528A4.2    | 0.427491579 | 1.34489317  | 0.000687939 | 0.122803898 | 3.162450069 |
| ENSG00000135324 | MRAP2           | 0.428763933 | 1.346079793 | 0.000248723 | 0.10305307  | 3.604284053 |
| ENSG00000272086 | CTD-2186M15.3   | 0.431417067 | 1.348557528 | 0.00053708  | 0.114740192 | 3.26996102  |
| ENSG00000224259 | RP11-48O20.4    | 0.437106555 | 1.353886271 | 0.000311243 | 0.104657875 | 3.506900407 |
| ENSG00000156006 | NAT2            | 0.440147082 | 1.35674264  | 9.63E-05    | 0.07454916  | 4.016373713 |
| ENSG00000187824 | TMEM220         | 0.4568907   | 1.372580439 | 0.000850189 | 0.126745464 | 3.070484518 |
| ENSG00000214796 | RP11-480I12.5   | 0.457852902 | 1.373496184 | 0.000569702 | 0.114740192 | 3.244352256 |
| ENSG00000249267 | LINC00939       | 0.459994204 | 1.375536292 | 0.000476361 | NA          | 3.322063802 |
| ENSG00000213302 | RP11-560I19.2   | 0.469689662 | 1.384811549 | 0.000907017 | NA          | 3.042384573 |
| ENSG00000103260 | METRNL          | 0.47465095  | 1.38958198  | 0.000294093 | 0.104657875 | 3.531515312 |
| ENSG00000241224 | RP11-59E19.1    | 0.492583386 | 1.406962021 | 0.000440896 | 0.11108458  | 3.355663841 |
| ENSG00000172159 | FRMD3           | 0.496261368 | 1.410553482 | 8.68E-05    | 0.073187151 | 4.061480275 |
| ENSG00000228630 | HOTAIR          | 0.500571724 | 1.414774111 | 0.000339869 | NA          | 3.468688446 |

|                 |               |             |             |             |             |             |
|-----------------|---------------|-------------|-------------|-------------|-------------|-------------|
| ENSG00000250567 | CTD-2154H6.1  | 0.5083485   | 1.422420972 | 0.000836297 | NA          | 3.077639461 |
| ENSG00000231887 | PRH1          | 0.509096217 | 1.423158372 | 0.000854294 | 0.126745464 | 3.068392644 |
| ENSG00000158486 | DNAH3         | 0.510564091 | 1.424607105 | 0.000772795 | 0.125163736 | 3.111935696 |
| ENSG00000265933 | LINC00668     | 0.516902849 | 1.430880161 | 0.000913764 | 0.131939809 | 3.039165956 |
| ENSG00000264127 | SCML2P1       | 0.523354997 | 1.437293801 | 0.000786943 | 0.125163736 | 3.104056723 |
| ENSG00000181019 | NQO1          | 0.526844015 | 1.440773963 | 0.0004993   | 0.114740192 | 3.301638434 |
| ENSG00000214264 | RP11-356J5.5  | 0.530617199 | 1.444547055 | 0.000225276 | NA          | 3.647285074 |
| ENSG00000203306 | AP001007.1    | 0.532826122 | 1.446760507 | 0.000766955 | 0.125163736 | 3.115230117 |
| ENSG00000266949 | LYPD8         | 0.53892195  | 1.452886446 | 0.000329401 | 0.104657875 | 3.482275087 |
| ENSG00000267385 | CTB-50L17.14  | 0.539760492 | 1.453731157 | 0.000559696 | NA          | 3.252047797 |
| ENSG00000233215 | AP000472.2    | 0.54247436  | 1.456468359 | 0.000591305 | 0.115224761 | 3.228188449 |
| ENSG00000261602 | CTD-2033A16.1 | 0.54325599  | 1.457257665 | 0.0005573   | 0.114740192 | 3.253910957 |
| ENSG00000134955 | SLC37A2       | 0.552340256 | 1.466462578 | 0.000570628 | 0.114740192 | 3.243646922 |
| ENSG00000170298 | LGALS9B       | 0.554786382 | 1.468951111 | 0.000431295 | 0.11108458  | 3.365225577 |
| ENSG00000213996 | TM6SF2        | 0.560580758 | 1.474862805 | 0.000514261 | 0.114740192 | 3.28881641  |
| ENSG00000169347 | GP2           | 0.562941241 | 1.477277895 | 0.00053171  | 0.114740192 | 3.274325172 |
| ENSG00000267629 | AC138430.4    | 0.568933823 | 1.483426887 | 0.00043966  | 0.11108458  | 3.356883044 |
| ENSG00000210176 | MT-TH         | 0.572029932 | 1.486613827 | 5.99E-05    | 0.06962657  | 4.222573178 |
| ENSG00000147257 | GPC3          | 0.578952421 | 1.493764193 | 0.00046331  | 0.113985219 | 3.334128326 |
| ENSG00000187134 | AKR1C1        | 0.579120949 | 1.493938697 | 0.000418832 | 0.11108458  | 3.377960144 |
| ENSG00000268424 | AC008948.1    | 0.582616847 | 1.497563157 | 0.000186422 | 0.099731231 | 3.729502837 |
| ENSG00000130600 | H19           | 0.584536015 | 1.499556639 | 0.0004168   | NA          | 3.38007229  |
| ENSG00000210184 | MT-TS2        | 0.588499939 | 1.503682461 | 9.64E-06    | 0.025453221 | 5.015922966 |
| ENSG00000130701 | RBBP8NL       | 0.588680975 | 1.503871162 | 3.19E-05    | 0.051009747 | 4.496209317 |
| ENSG00000261761 | RP11-103J17.2 | 0.588838121 | 1.50403498  | 0.000398362 | NA          | 3.399722096 |
| ENSG00000165192 | ASB11         | 0.589967029 | 1.505212347 | 0.000374334 | NA          | 3.426740725 |
| ENSG00000259237 | RP11-209E8.1  | 0.591958998 | 1.507292071 | 0.000180822 | NA          | 3.742748732 |
| ENSG00000165188 | RNF183        | 0.60795057  | 1.524092611 | 0.000159753 | NA          | 3.796550977 |
| ENSG00000210191 | MT-TL2        | 0.613214527 | 1.52966372  | 1.27E-06    | 0.025453221 | 5.896196279 |
| ENSG00000247627 | MTND4P12      | 0.625395084 | 1.54263322  | 0.000176207 | 0.099053811 | 3.753976843 |
| ENSG00000105251 | SHD           | 0.654446756 | 1.574012236 | 7.30E-06    | 0.025453221 | 5.13667714  |

|                 |              |             |             |          |             |             |
|-----------------|--------------|-------------|-------------|----------|-------------|-------------|
| ENSG00000184163 | FAM132A      | 0.664945291 | 1.585508147 | 8.14E-06 | 0.025453221 | 5.089375595 |
| ENSG00000137225 | CAPN11       | 0.667061925 | 1.587836015 | 5.97E-05 | NA          | 4.224025669 |
| ENSG00000232175 | RP4-659I19.1 | 0.712128963 | 1.63821983  | 2.03E-05 | NA          | 4.692503962 |



XXbac-B476C20.9 Gene Expression from GTEx (Release V6)

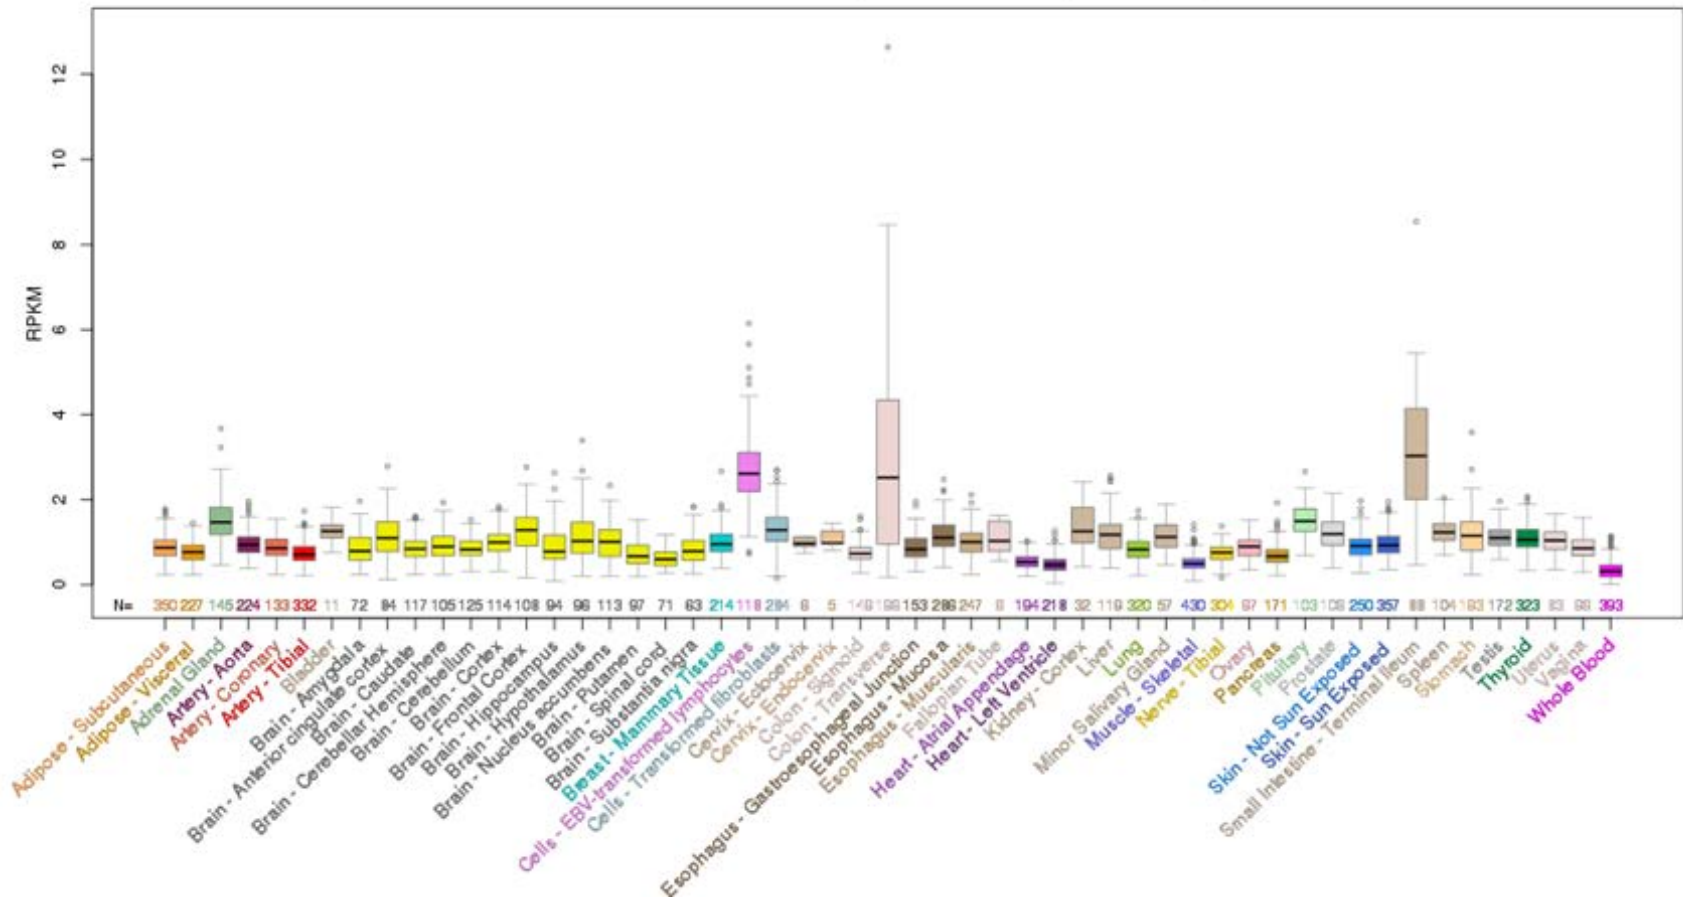

Supplement: 41598_2019_42568_MOESM1_ESM.pdf [file 41598_2019_42568_MOESM1_ESM.pdf]
